# Supplementary material for: Genome-wide identification of the MIKCc-type MADS-box gene family in Chrysanthemum lavandulifolium reveals their roles in the capitulum development
Source: PubMed Central journal article supplement (PMC10076714; doi:10.3389/fpls.2023.1153490), 2023-03-23
Supplement: DataSheet_1.pdf [file DataSheet_1.pdf]

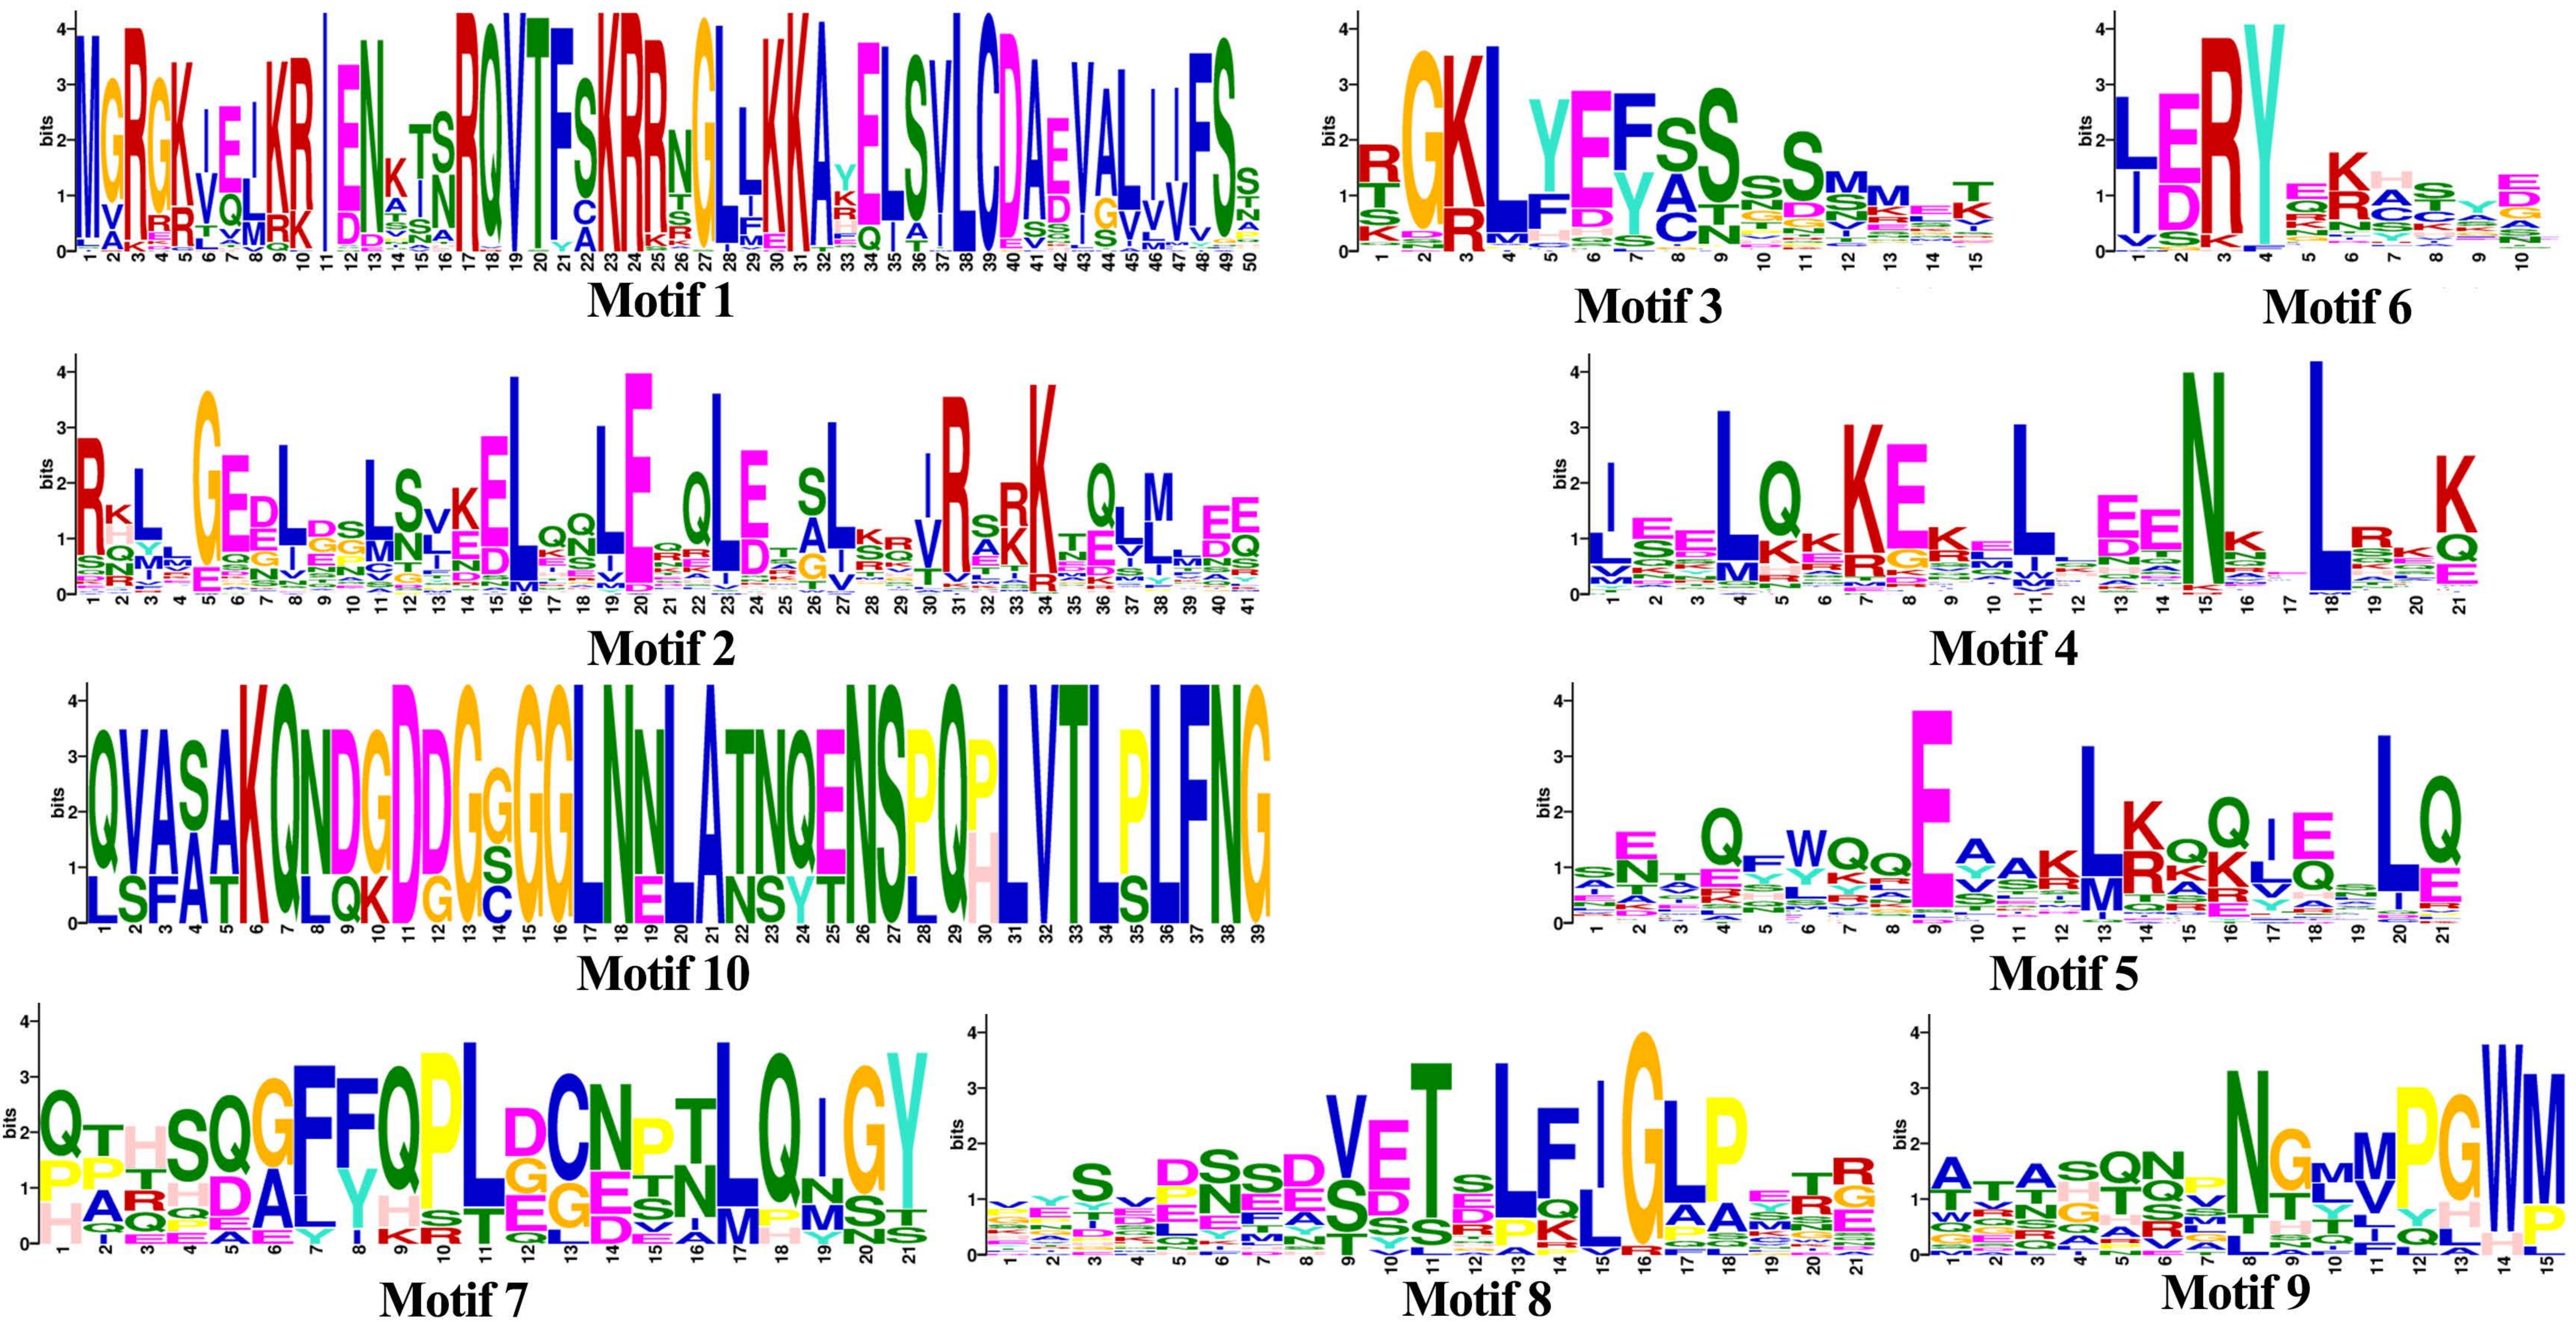

Supplementary Figure 1. Sequence logos of the *ClMIKc* and *AtMIKc* conserved motifs.



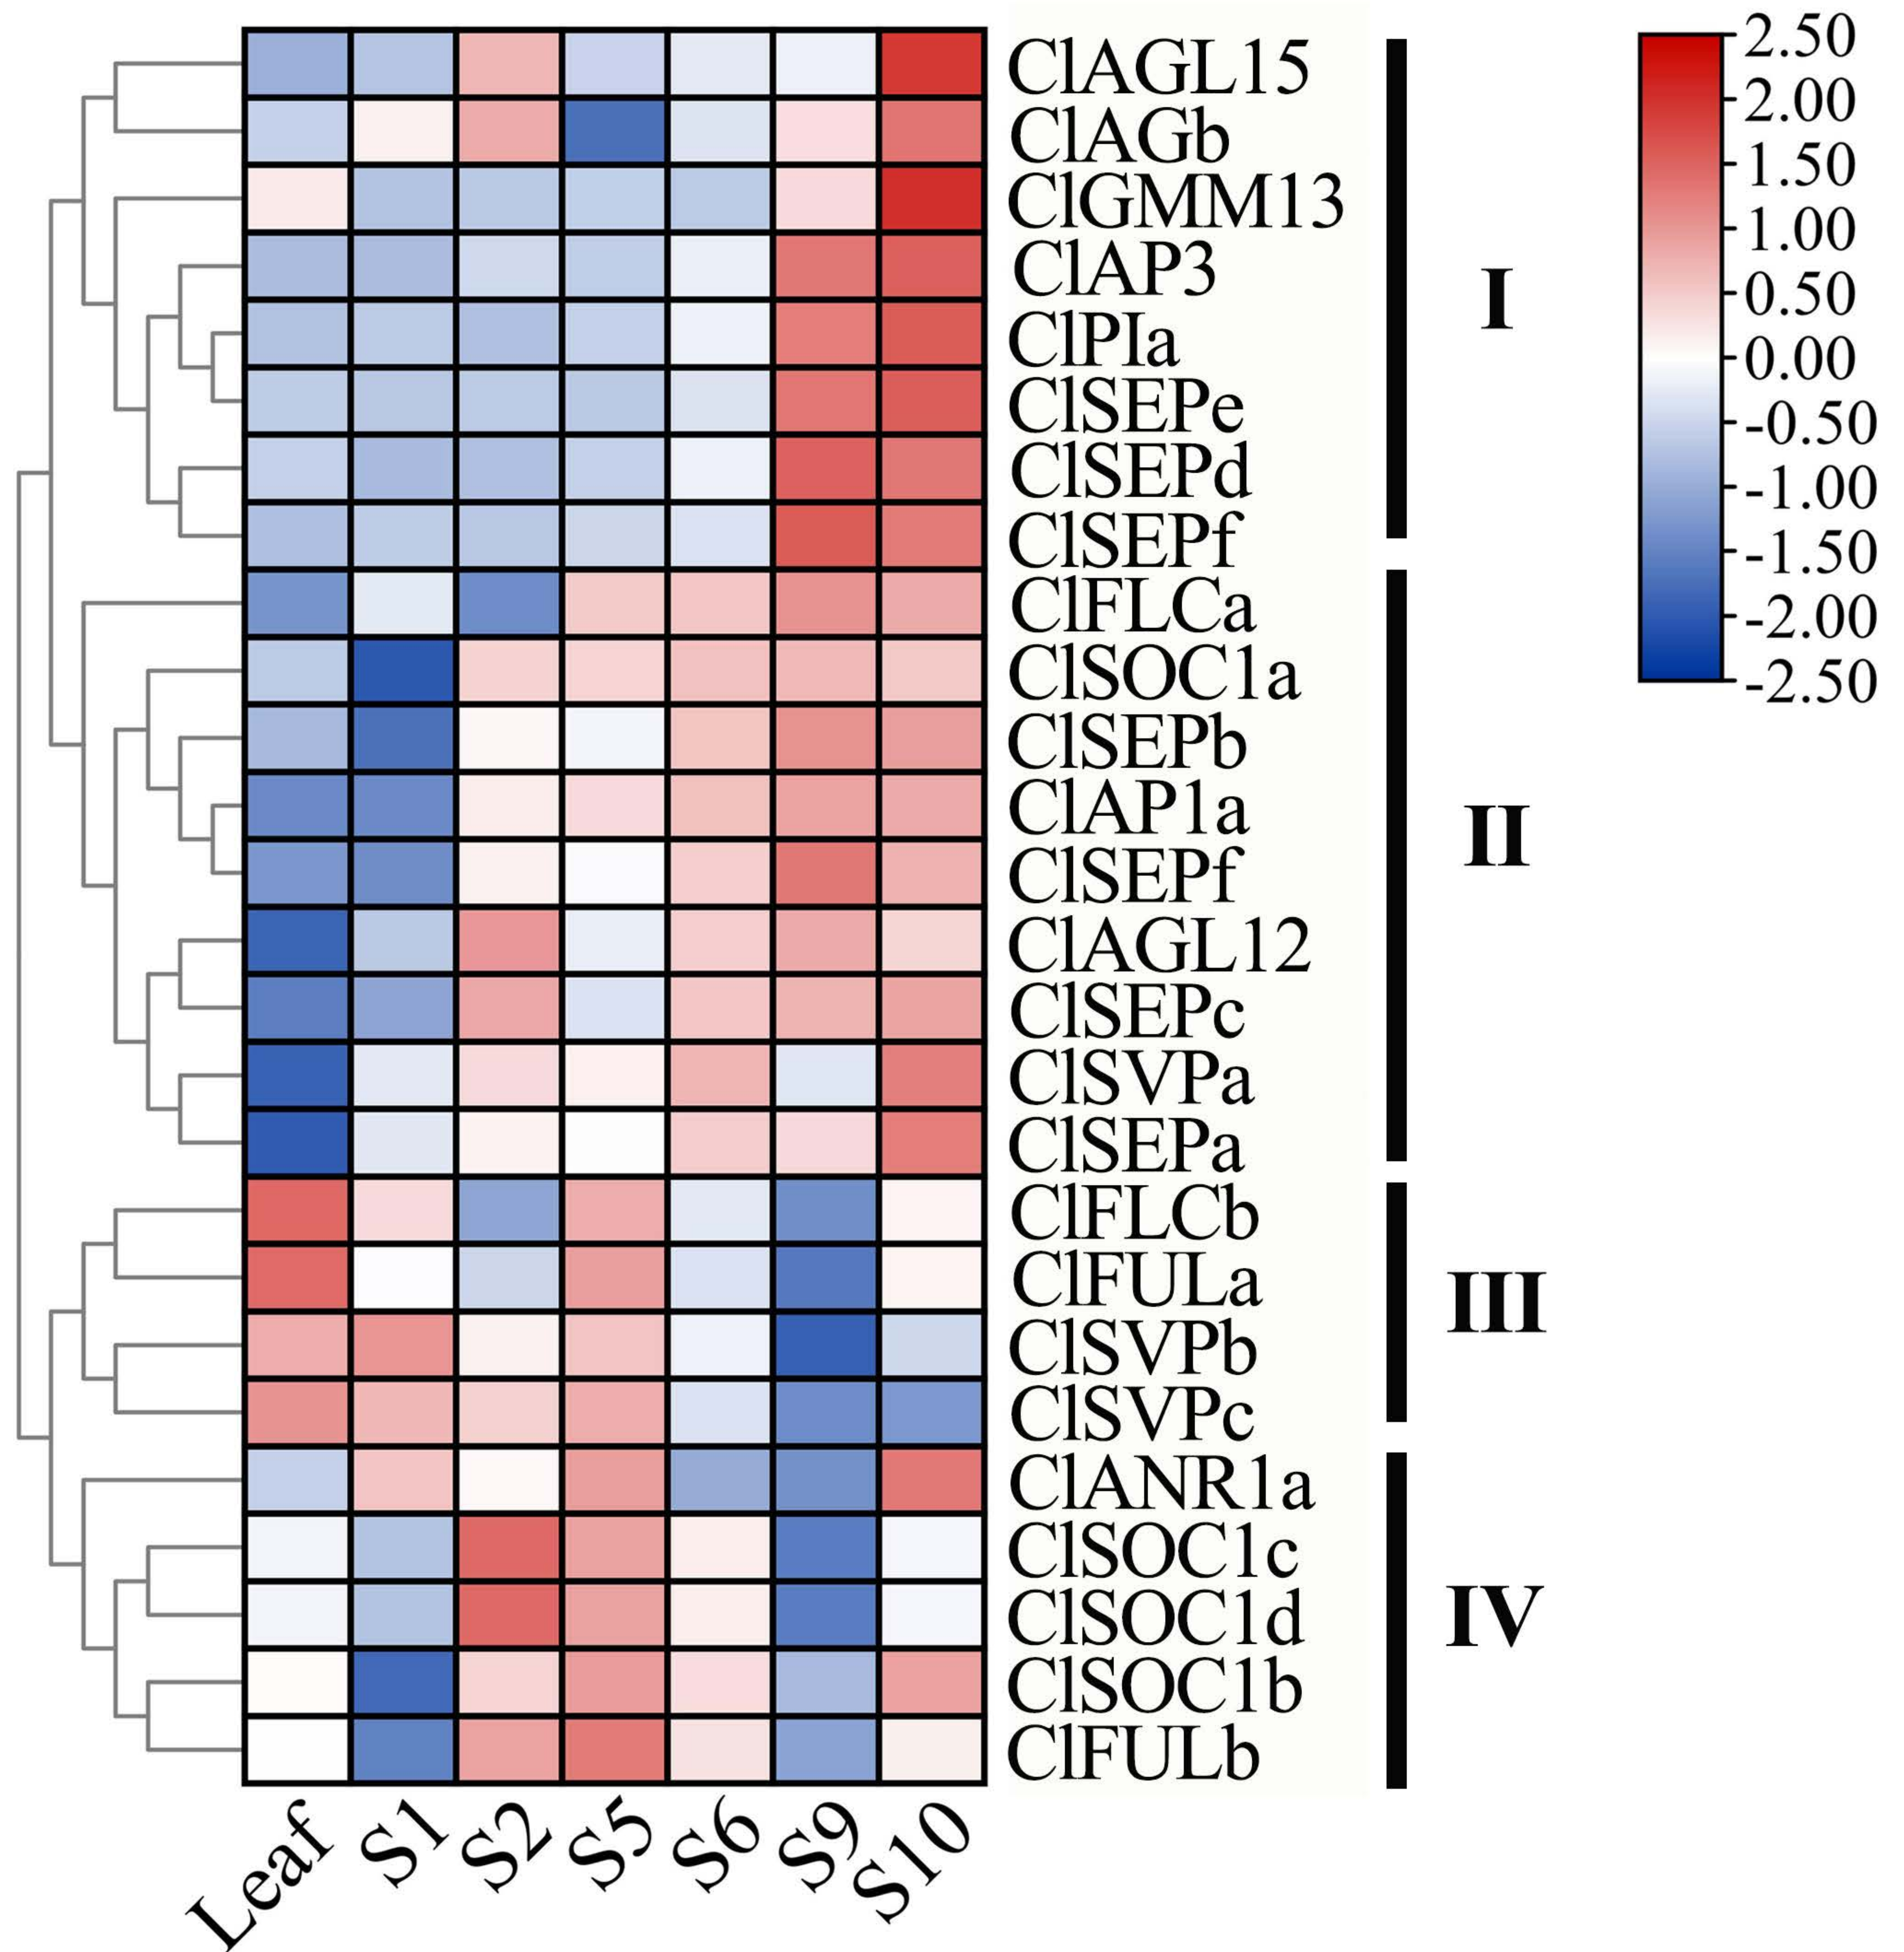

**Supplementary Figure 2.** Expression patterns of 26 *CLMIKc* in six periods of capitulum development and leaves



**A**

**Bait Protein**

**Prey Protein**

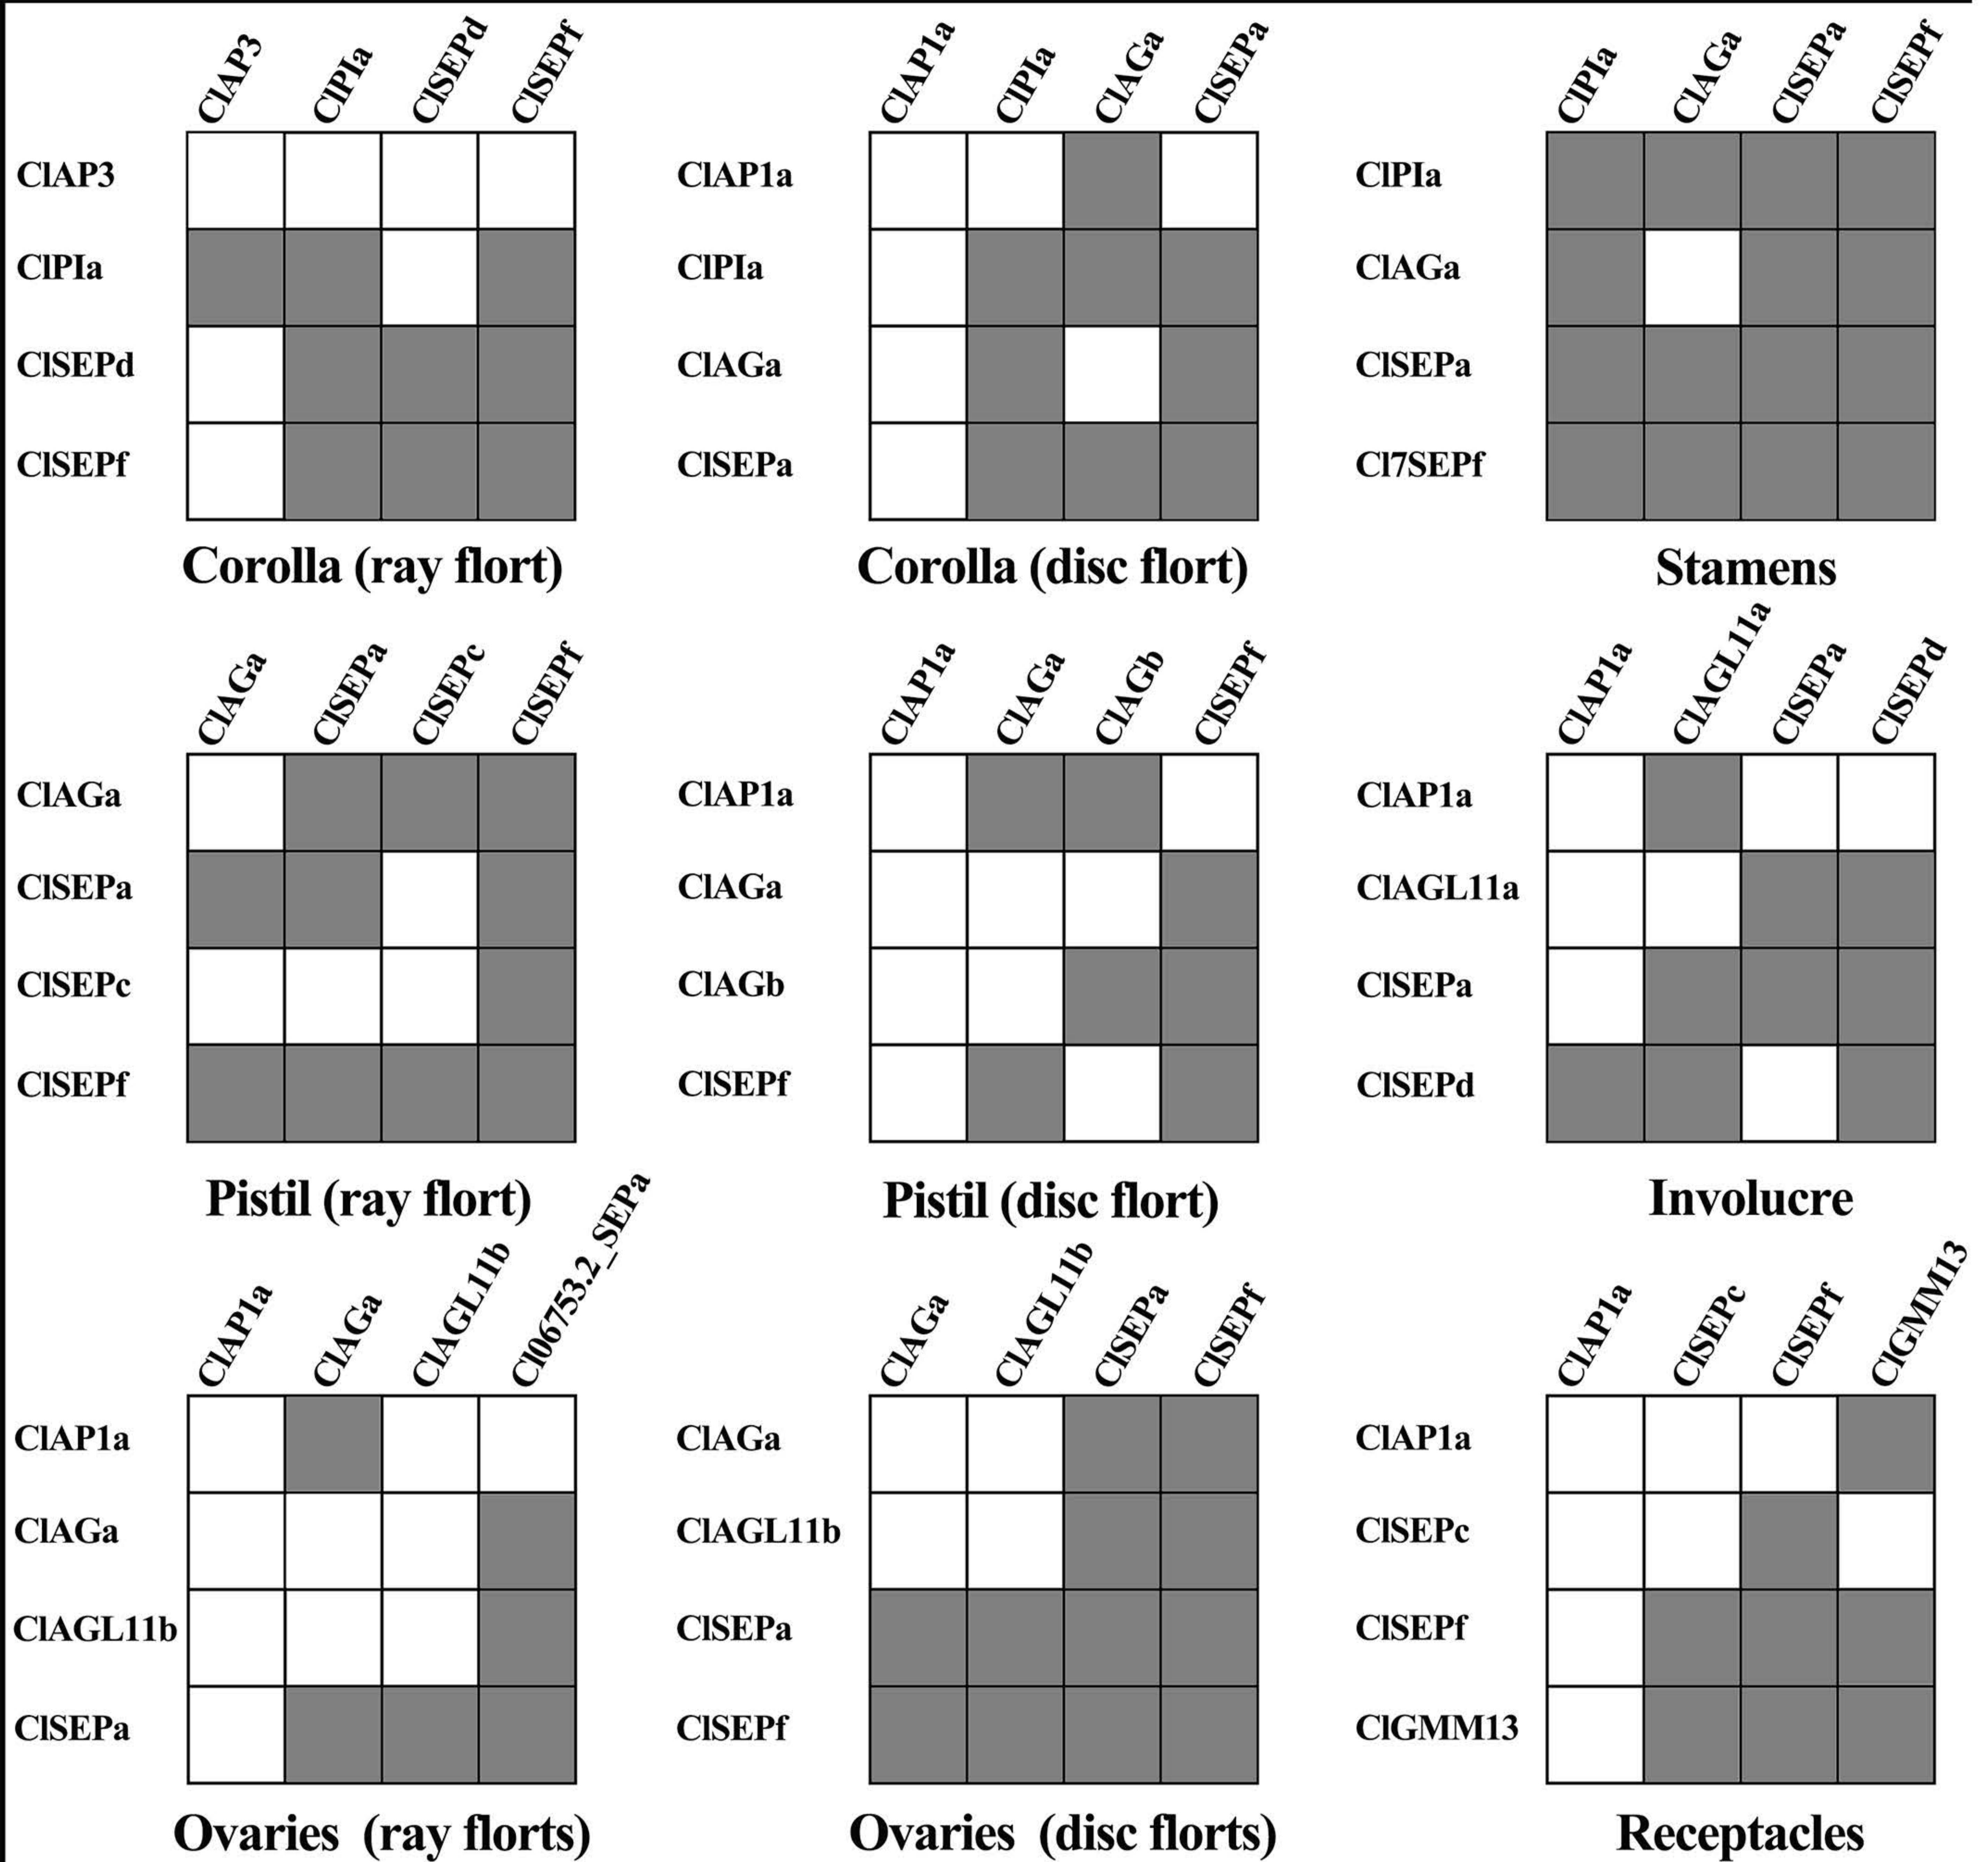

**B**

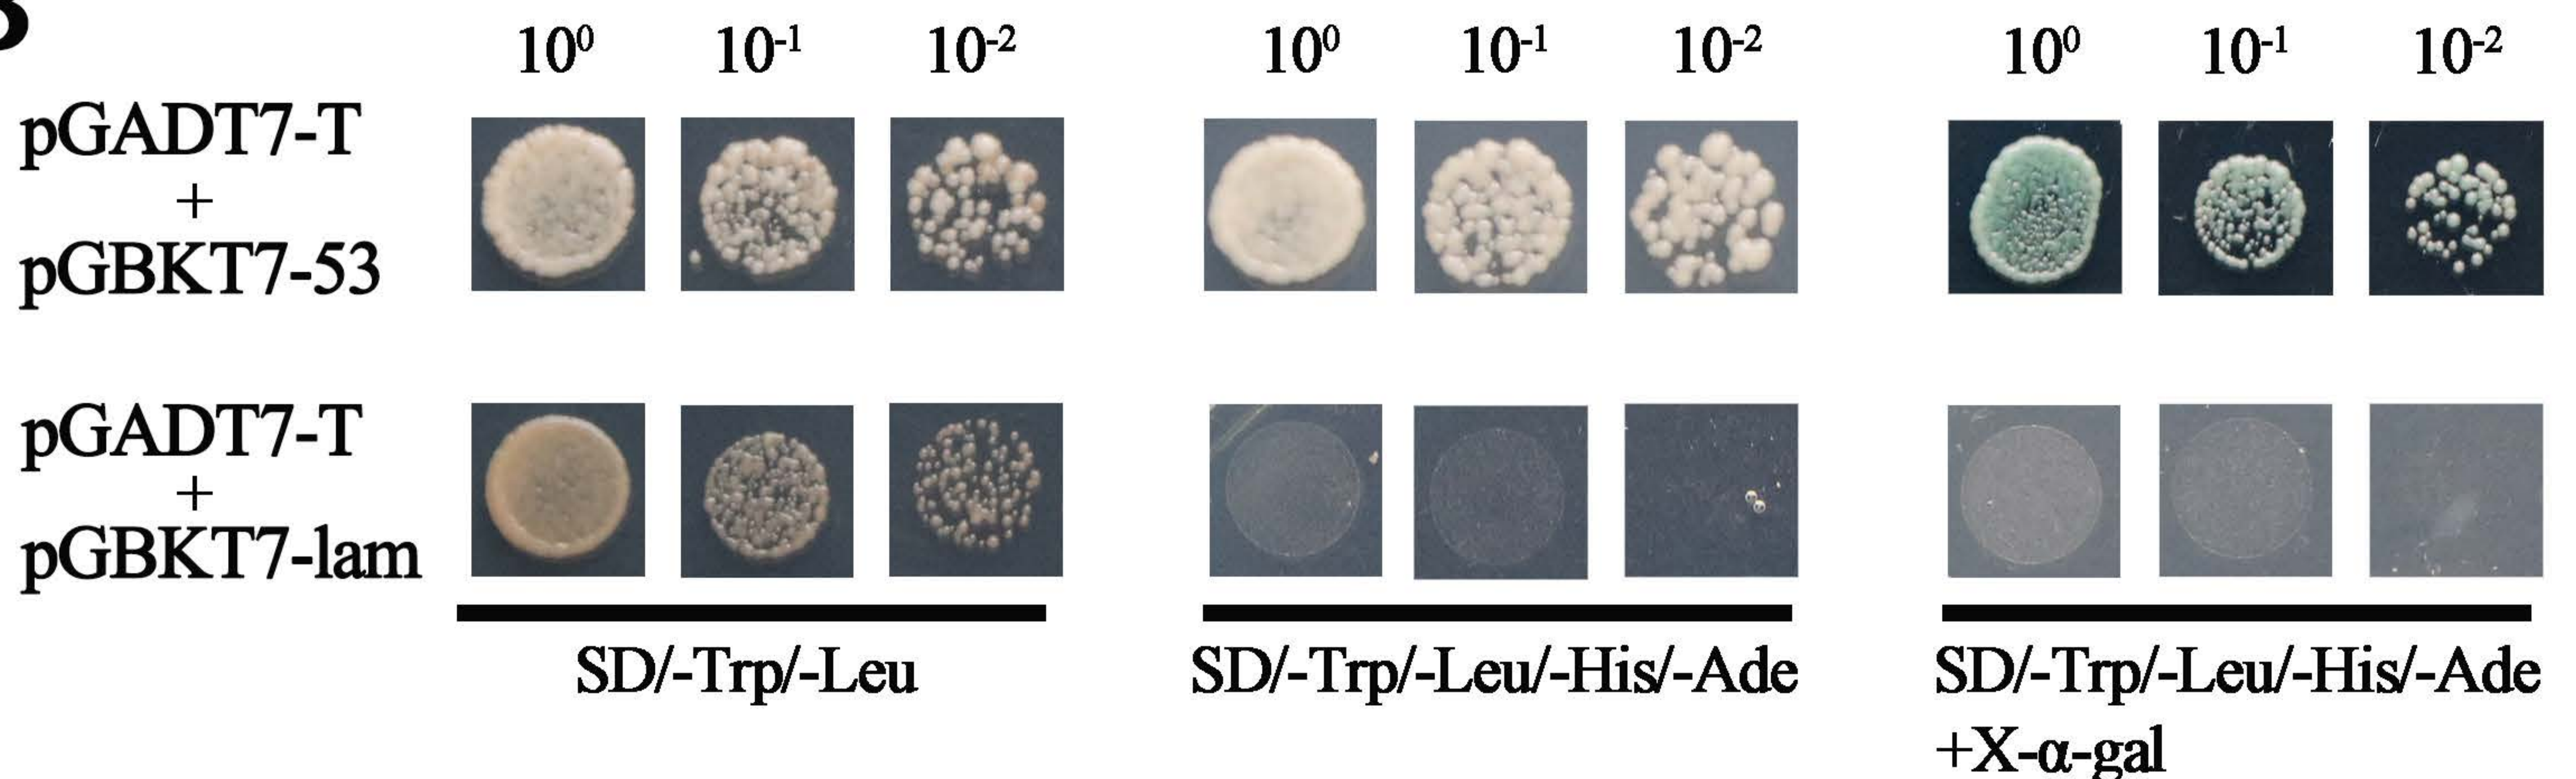

**Supplementary Figure 3.** Detection of ClMIKc interactions using the Y2H system.

A. Pairwise interactions of ClMIKc protein in nine floral organs.

The gray square indicates positive reciprocal interactions.

B. Positive (pGADT7+pGBKT7-53) and negative (pGADT7+GBKT7-lam) controls for Y2H assay.



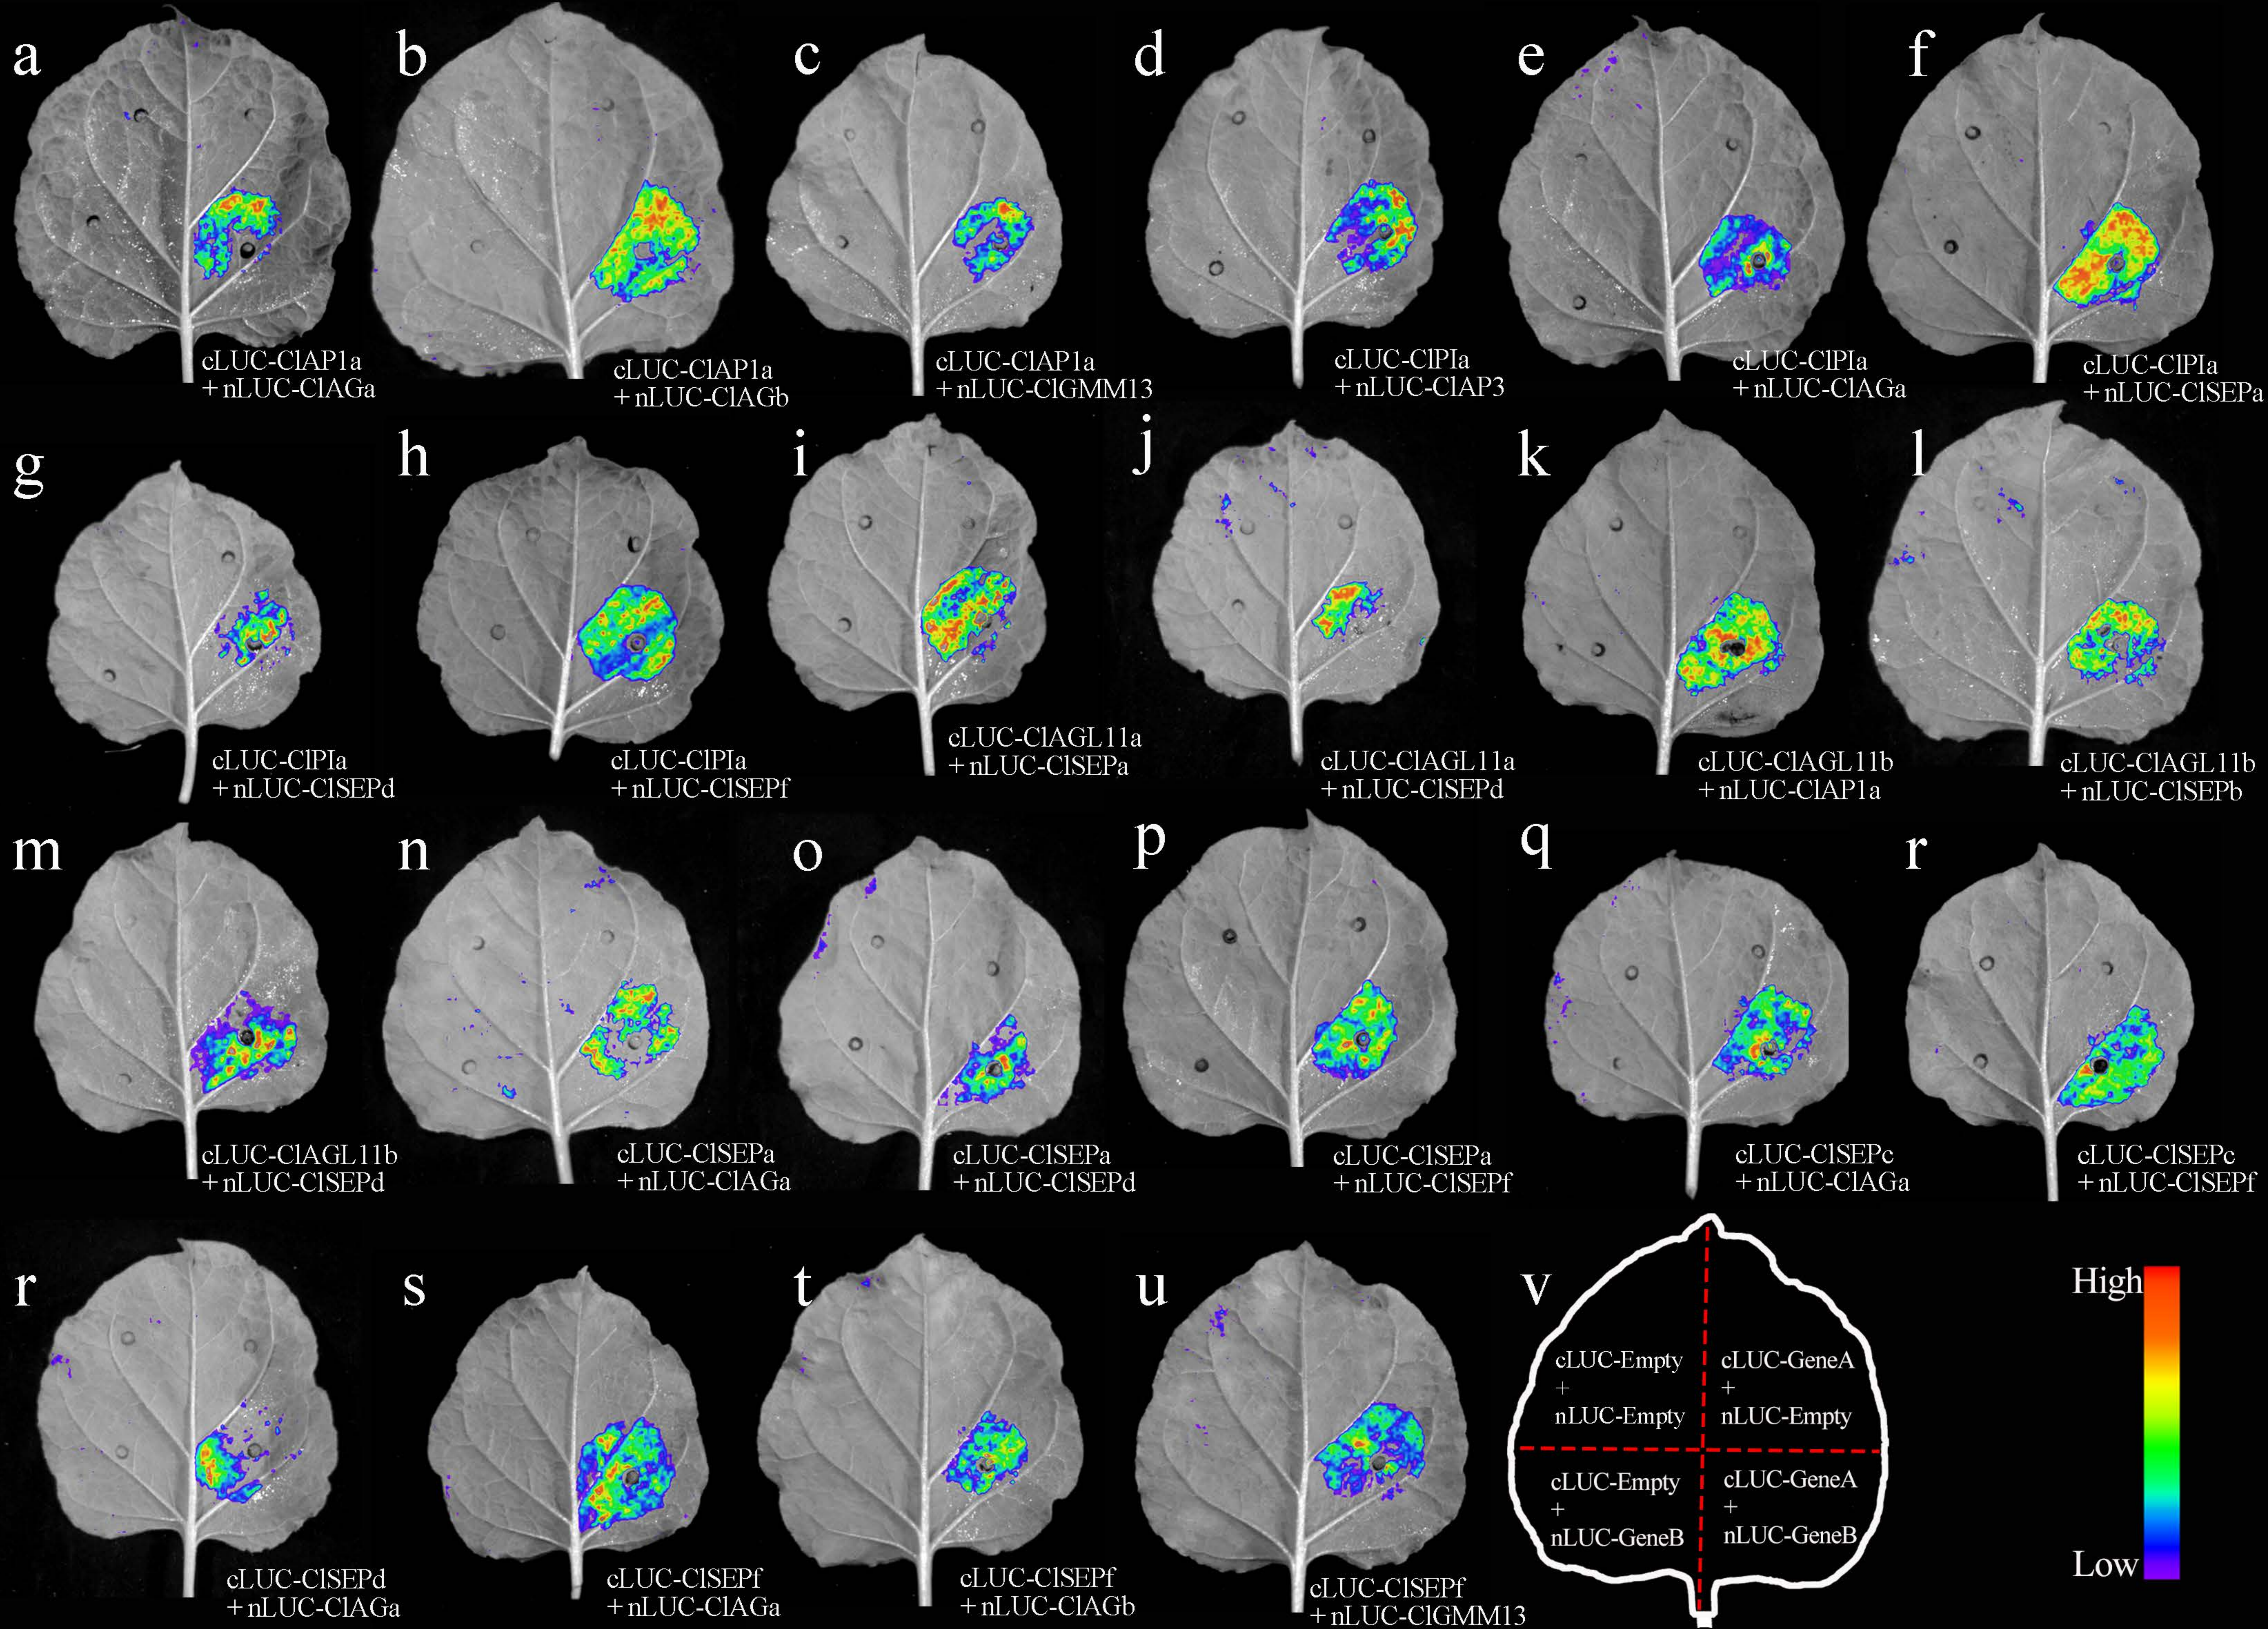

**Supplementary Figure 4. Validation of ClMIKc protein interactions using LCA in *N. benthamiana*.**
